# Supplementary material for: Bio-Evaluation of the Wound Healing Activity of Artemisia judaica L. as Part of the Plant’s Use in Traditional Medicine; Phytochemical, Antioxidant, Anti-Inflammatory, and Antibiofilm Properties of the Plant’s Essential Oils
Source: MDPI journal article supplement (doi:10.3390/antiox11020332), 2022-02-08
Supplement: s1 [file s1]

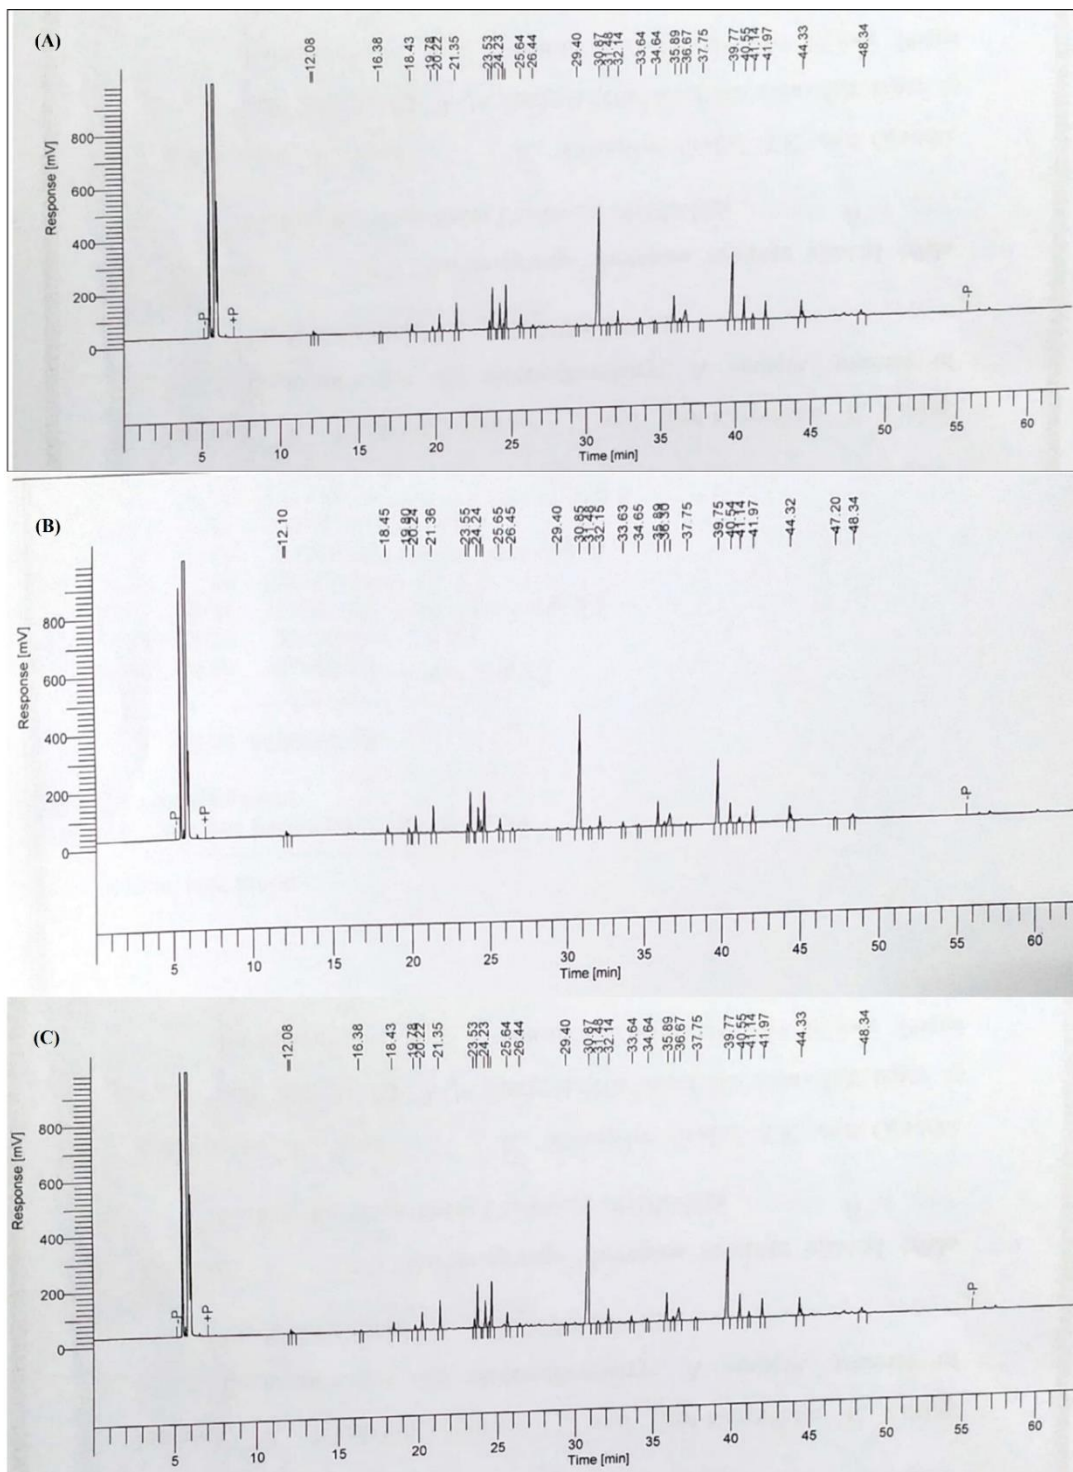

Figure S1: Gas Chromatography (GC), chromatograms for the (A) first ArJ essential oil sample, (B) second ArJ essential oil sample, and (C) third ArJ essential oil sample. The three essential oil samples were obtained from different distillation experiments and injected separately to the GC instrument to calculate the percentages of the volatile oil constituents'  $\pm$  SD.

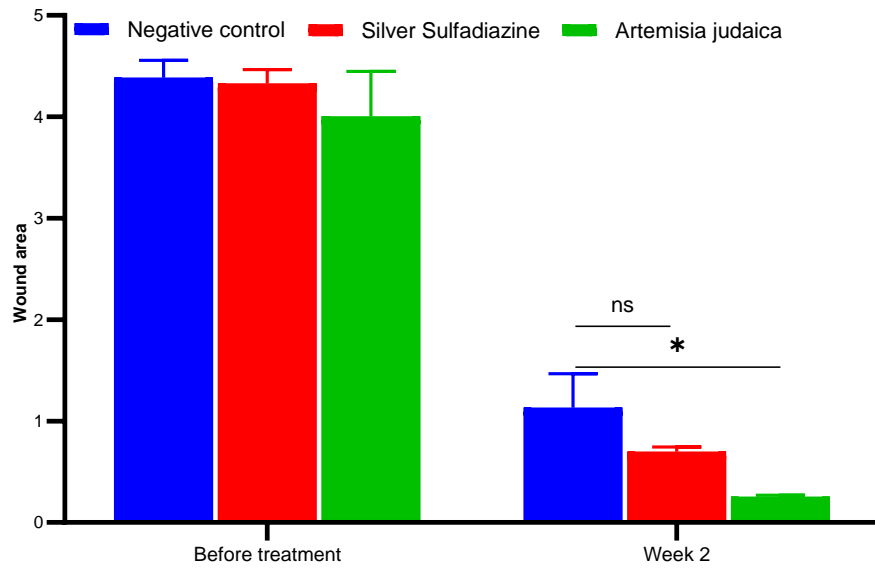

Figure S2 Wound area measurement. \* Values are denoted as mean  $\pm$  SEM. Statistical significance was performed using two-way ANOVA, followed by a posthoc test on GraphPad Prism 8.0.2. ns: non-significant, \* significantly different ( $P<0.05$ ) using Tukey's multi-group comparisons.

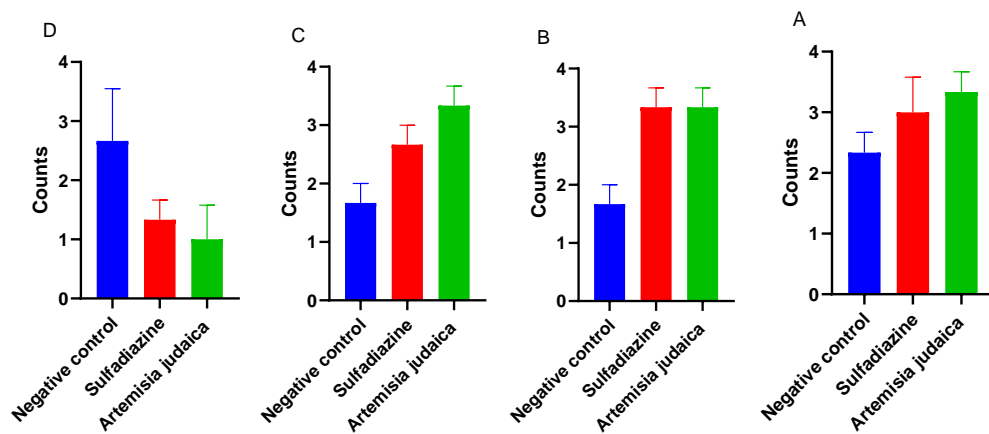

Figure S3. Microscopic analysis of skin wound after treatment with SS and ArJ and compared with negative control for amount of fibroblast (A), collagen (B), neovascularization (C) and inflammation (D). Data was scored from 0-4 where 0, 1, 2, 3, and 4 represented normal, low, moderate, high, and very high, respectively.

|                | I. Intact control | II. Negative control (skin burn without treatment) | III. Silver Sulfadiazine | IV. Artemisia judaica |
|----------------|-------------------|----------------------------------------------------|--------------------------|-----------------------|
|                | 0.050213          | 0.103255                                           | 0.038773                 | 0.046053              |
|                | 0.050435          | 0.038773                                           | 0.038565                 | 0.043973              |
|                | 0.04084           | 0.038149                                           | 0.236173                 | 0.567                 |
|                | 0.04129           | 0.041061                                           | 0.32                     | 0.612                 |
|                | 0.031             | 0.016181                                           | 0.35                     | 0.595                 |
| <b>Average</b> | <b>0.043</b>      | <b>0.047</b>                                       | <b>0.197</b>             | <b>0.373</b>          |
| <b>media n</b> | <b>0.041</b>      | <b>0.039</b>                                       | <b>0.236</b>             | <b>0.567</b>          |
| <b>S.D</b>     | <b>0.008</b>      | <b>0.033</b>                                       | <b>0.150</b>             | <b>0.300</b>          |
| <b>n</b>       | <b>5.000</b>      | <b>5.000</b>                                       | <b>5.000</b>             | <b>5.000</b>          |
| <b>S.E</b>     | <b>0.004</b>      | <b>0.015</b>                                       | <b>0.067</b>             | <b>0.134</b>          |

Table S1: Original data of SOD

|                | I. Intact control | II. Negative control (skin burn without treatment) | III. Silver Sulfadiazine | IV. Artemisia judaica |
|----------------|-------------------|----------------------------------------------------|--------------------------|-----------------------|
|                | 1.261             | 1.265                                              | 1.301                    | 2.032                 |
|                | 1.495             | 1.214                                              | 1.863                    | 1.625                 |
|                | 1.321             | 0.944                                              | 2.321                    | 1.247                 |
|                | 1.234             | 1.16                                               | 2.12                     | 2.213                 |
|                | 1.461             | 1.011                                              | 1.36                     | 1.984                 |
| <b>Average</b> | <b>1.354</b>      | <b>1.119</b>                                       | <b>1.793</b>             | <b>1.820</b>          |
| <b>media n</b> | <b>1.321</b>      | <b>1.160</b>                                       | <b>1.863</b>             | <b>1.984</b>          |
| <b>S.D</b>     | <b>0.118</b>      | <b>0.136</b>                                       | <b>0.453</b>             | <b>0.385</b>          |
| <b>n</b>       | <b>5.000</b>      | <b>5.000</b>                                       | <b>5.000</b>             | <b>5.000</b>          |
| <b>S.E</b>     | <b>0.053</b>      | <b>0.061</b>                                       | <b>0.203</b>             | <b>0.172</b>          |

Table S2: Original data of CAT

|                | I. Intact control | II. Negative control (skin burn without treatment) | III. Silver Sulfadiazine | IV. Artemisia judaica |
|----------------|-------------------|----------------------------------------------------|--------------------------|-----------------------|
|                | 937.6             | 1301                                               | 1213.6                   | 1321.1                |
|                | 888.1             | 1121                                               | 1211.6                   | 1221.1                |
|                | 724               | 1186                                               | 1121.1                   | 1324.1                |
|                | 784               | 1098                                               | 1145                     | 1284                  |
|                | 851               | 1364                                               | 1294                     | 1304                  |
| <b>Average</b> | <b>836.940</b>    | <b>1214.000</b>                                    | <b>1197.060</b>          | <b>1290.860</b>       |
| <b>Media</b>   | <b>851.000</b>    | <b>1186.000</b>                                    | <b>1211.600</b>          | <b>1304.000</b>       |

|            |               |                |               |               |
|------------|---------------|----------------|---------------|---------------|
| <b>n</b>   |               |                |               |               |
| <b>S.D</b> | <b>84.418</b> | <b>115.063</b> | <b>67.754</b> | <b>42.147</b> |
| <b>n</b>   | <b>5.000</b>  | <b>5.000</b>   | <b>5.000</b>  | <b>5.000</b>  |
| <b>S.E</b> | <b>37.753</b> | <b>51.458</b>  | <b>30.301</b> | <b>18.849</b> |

Table S3: Original data of LP

|                | <b>I. Intact control</b> | <b>II. Negative control (skin burn without treatment)</b> | <b>III. Silver Sulfadiazine</b> | <b>IV. Artemisia judaica</b> |
|----------------|--------------------------|-----------------------------------------------------------|---------------------------------|------------------------------|
|                | 21                       | 13.27                                                     | 26.27                           | 19.77                        |
|                | 23                       | 15.57                                                     | 22.97                           | 23.57                        |
|                | 18                       | 19                                                        | 20.97                           | 15.77                        |
|                | 26.57                    | 26                                                        | 24.56                           | 17.65                        |
|                | 15.27                    | 23                                                        | 23                              | 21                           |
| <b>Average</b> | <b>20.768</b>            | <b>19.368</b>                                             | <b>23.554</b>                   | <b>19.552</b>                |
| <b>media n</b> | <b>21.000</b>            | <b>19.000</b>                                             | <b>23.000</b>                   | <b>19.770</b>                |
| <b>S.D</b>     | <b>4.376</b>             | <b>5.218</b>                                              | <b>1.982</b>                    | <b>3.009</b>                 |
| <b>n</b>       | <b>5.000</b>             | <b>5.000</b>                                              | <b>5.000</b>                    | <b>5.000</b>                 |
| <b>S.E</b>     | <b>1.957</b>             | <b>2.334</b>                                              | <b>0.886</b>                    | <b>1.346</b>                 |

Table S4: Original data of IL-1b

|                | <b>I. Intact control</b> | <b>II. Negative control (skin burn without treatment)</b> | <b>III. Silver Sulfadiazine</b> | <b>IV. Artemisia judaica</b> |
|----------------|--------------------------|-----------------------------------------------------------|---------------------------------|------------------------------|
|                | 844.22                   | 735.33                                                    | 842                             | 862                          |
|                | 795.33                   | 753.11                                                    | 766.44                          | 999.78                       |
|                | 793.11                   | 859.78                                                    | 737.56                          | 704.22                       |
|                | 810                      | 688.67                                                    | 789                             | 956                          |
|                | 788                      | 844.22                                                    | 812                             | 824                          |
| <b>Average</b> | <b>806.132</b>           | <b>776.222</b>                                            | <b>789.400</b>                  | <b>869.200</b>               |
| <b>media n</b> | <b>795.330</b>           | <b>753.110</b>                                            | <b>789.000</b>                  | <b>862.000</b>               |
| <b>S.D</b>     | <b>22.807</b>            | <b>73.276</b>                                             | <b>40.287</b>                   | <b>116.080</b>               |
| <b>n</b>       | <b>5.000</b>             | <b>5.000</b>                                              | <b>5.000</b>                    | <b>5.000</b>                 |
| <b>S.E</b>     | <b>10.200</b>            | <b>32.770</b>                                             | <b>18.017</b>                   | <b>51.913</b>                |

Table S5: Original data of IL-6

|  | <b>I. Intact control</b> | <b>II. Negative control (skin burn without treatment)</b> | <b>III. Silver Sulfadiazine</b> | <b>IV. Artemisia judaica</b> |
|--|--------------------------|-----------------------------------------------------------|---------------------------------|------------------------------|
|  | 3.14                     | 3.21                                                      | 12.59                           | 14.14                        |
|  | 3.78                     | 2.81                                                      | 12.7                            | 12.92                        |

|                |              |              |               |               |
|----------------|--------------|--------------|---------------|---------------|
|                | 3.86         | 3.87         | 12.7          | 13.59         |
|                | 3.94         | 2.63         | 13.21         | 14.06         |
|                | 3.01         | 2.47         | 12.21         | 12.26         |
| <b>Average</b> | <b>3.546</b> | <b>2.998</b> | <b>12.682</b> | <b>13.394</b> |
| <b>median</b>  | <b>3.780</b> | <b>2.810</b> | <b>12.700</b> | <b>13.590</b> |
| <b>S.D</b>     | <b>0.436</b> | <b>0.560</b> | <b>0.357</b>  | <b>0.798</b>  |
| <b>n</b>       | <b>5.000</b> | <b>5.000</b> | <b>5.000</b>  | <b>5.000</b>  |
| <b>S.E</b>     | <b>0.195</b> | <b>0.250</b> | <b>0.160</b>  | <b>0.357</b>  |

Table S6: Original data of IL-10

|                | <b>I. Intact control</b> | <b>II. Negative control (skin burn without treatment)</b> | <b>III. Silver Sulfadiazine</b> | <b>IV. Artemisia judaica</b> |
|----------------|--------------------------|-----------------------------------------------------------|---------------------------------|------------------------------|
|                | 11.05                    | 15.45                                                     | 13.13                           | 11.47                        |
|                | 8.47                     | 16.78                                                     | 12.13                           | 12.55                        |
|                | 9.56                     | 15.26                                                     | 12.47                           | 11.13                        |
|                | 10.56                    | 12.35                                                     | 13.64                           | 12.99                        |
|                | 8.21                     | 17.86                                                     | 12.87                           | 11.68                        |
| <b>Average</b> | <b>9.570</b>             | <b>15.540</b>                                             | <b>12.848</b>                   | <b>11.964</b>                |
| <b>median</b>  | <b>9.560</b>             | <b>15.450</b>                                             | <b>12.870</b>                   | <b>11.680</b>                |
| <b>S.D</b>     | <b>1.248</b>             | <b>2.073</b>                                              | <b>0.584</b>                    | <b>0.777</b>                 |
| <b>n</b>       | <b>5.000</b>             | <b>5.000</b>                                              | <b>5.000</b>                    | <b>5.000</b>                 |
| <b>S.E</b>     | <b>0.558</b>             | <b>0.927</b>                                              | <b>0.261</b>                    | <b>0.348</b>                 |

Table S7: Original data of TNF- $\alpha$

|                | <b>I. Intact control</b> | <b>II. Negative control (skin burn without treatment)</b> | <b>III. Silver Sulfadiazine</b> | <b>IV. Artemisia judaica</b> |
|----------------|--------------------------|-----------------------------------------------------------|---------------------------------|------------------------------|
|                | 4.2                      | 3.71                                                      | 20.29                           | 19.79                        |
|                | 3.64                     | 3.86                                                      | 19.41                           | 19.95                        |
|                | 5.1                      | 3.66                                                      | 19.33                           | 19.33                        |
|                | 4.13                     | 4.2                                                       | 18.45                           | 18.62                        |
|                | 3.9                      | 3.93                                                      | 18.91                           | 18.21                        |
| <b>Average</b> | <b>4.194</b>             | <b>3.872</b>                                              | <b>19.278</b>                   | <b>19.180</b>                |
| <b>median</b>  | <b>4.130</b>             | <b>3.860</b>                                              | <b>19.330</b>                   | <b>19.330</b>                |
| <b>S.D</b>     | <b>0.552</b>             | <b>0.213</b>                                              | <b>0.683</b>                    | <b>0.749</b>                 |
| <b>n</b>       | <b>5.000</b>             | <b>5.000</b>                                              | <b>5.000</b>                    | <b>5.000</b>                 |
| <b>S.E</b>     | <b>0.247</b>             | <b>0.095</b>                                              | <b>0.305</b>                    | <b>0.335</b>                 |

Table S8: Original data of TGF-b1
